# Supplementary material for: Multiple hydrogen bonding mediates the formation of multicompartment micelles and hierarchical self-assembled structures from pseudo A-block-(B-graft-C) terpolymers
Source: Royal Society of Chemistry journal article supplement (doi:10.1039/c5py00663e), 2015-01-01
Supplement: c5py00663e1.pdf [file c5py00663e1.pdf]

## Supporting Information for

# Multiple Hydrogen Bonding Mediates the Formation of Multicompartment Micelles and Hierarchical Self-Assembled Structures From Pseudo *A-block-(B-graft-C)* Terpolymers

Yi-Chen Wu,<sup>a,b</sup> Bishnu Prasad Bastakoti,<sup>b</sup> Malay Pramanik,<sup>b</sup> Yusuke Yamauchi,<sup>b</sup> and Shiao-Wei Kuo<sup>a,\*</sup>

<sup>a</sup>Department of Materials and Optoelectronic Science, Center for Nanoscience and Nanotechnology, National Sun Yat-Sen University, Kaohsiung, 804, Taiwan

<sup>b</sup>World Premier International (WPI) Research Center for Materials Nanoarchitectonics (MANA), National Institute for Materials Science (NIMS), 1-1 Namiki, Tsukuba, Japan

\*To whom correspondence should be addressed

E-mail: kuosw@faculty.nsysu.edu.tw and Yamauchi.Yusuke@nims.go.jp

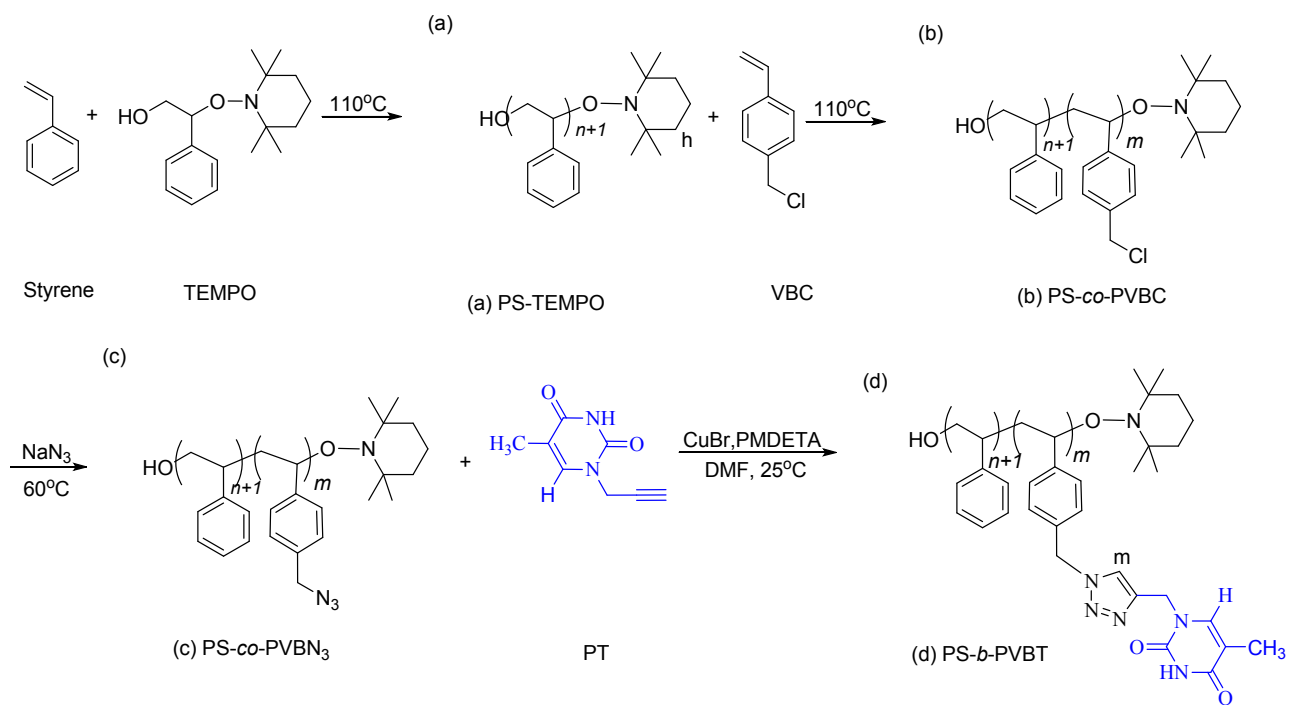

Scheme S1: Syntheses of (a) PS-TEMPO, (b) PS-*b*-PVBC, (c) PS-*b*-PVBN<sub>3</sub>, and (d) PS-*b*-PVBT.

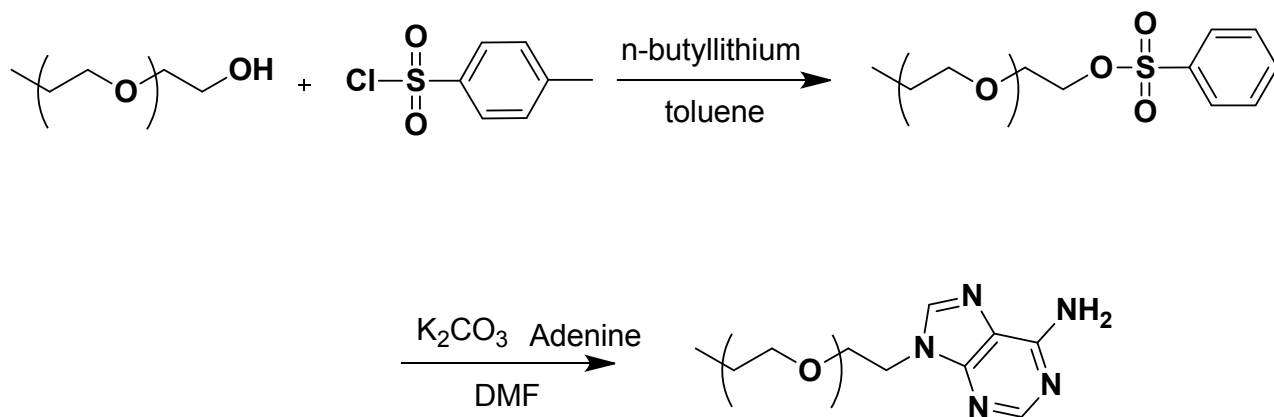

Scheme S2: Synthesis of the adenine-terminated PEO

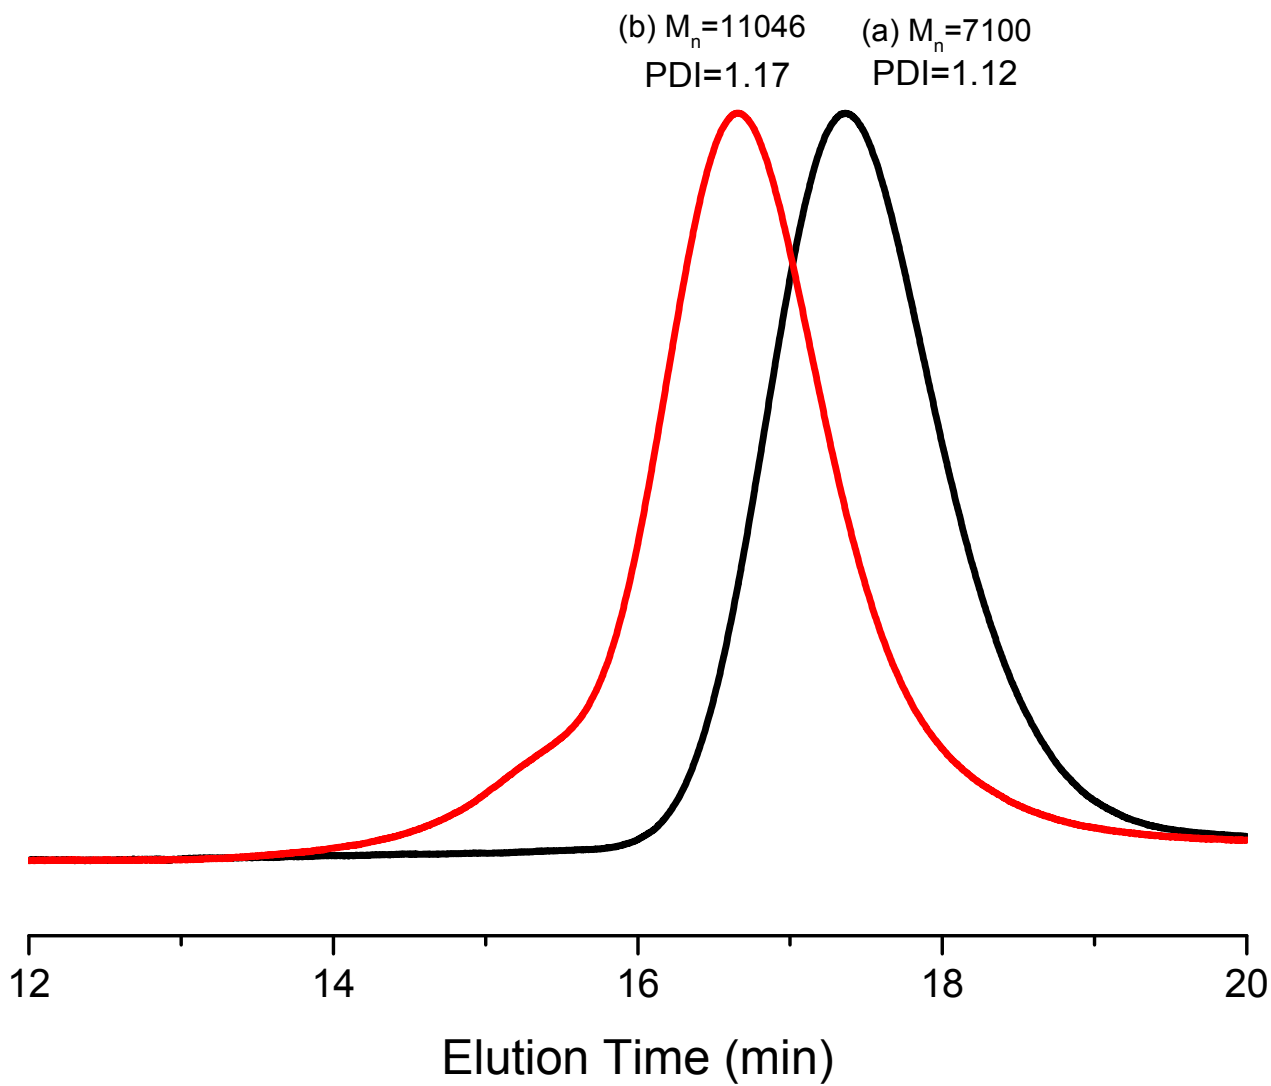

Figure S1: GPC analyses of (a) PS and (b) PS-*b*-PVBC.

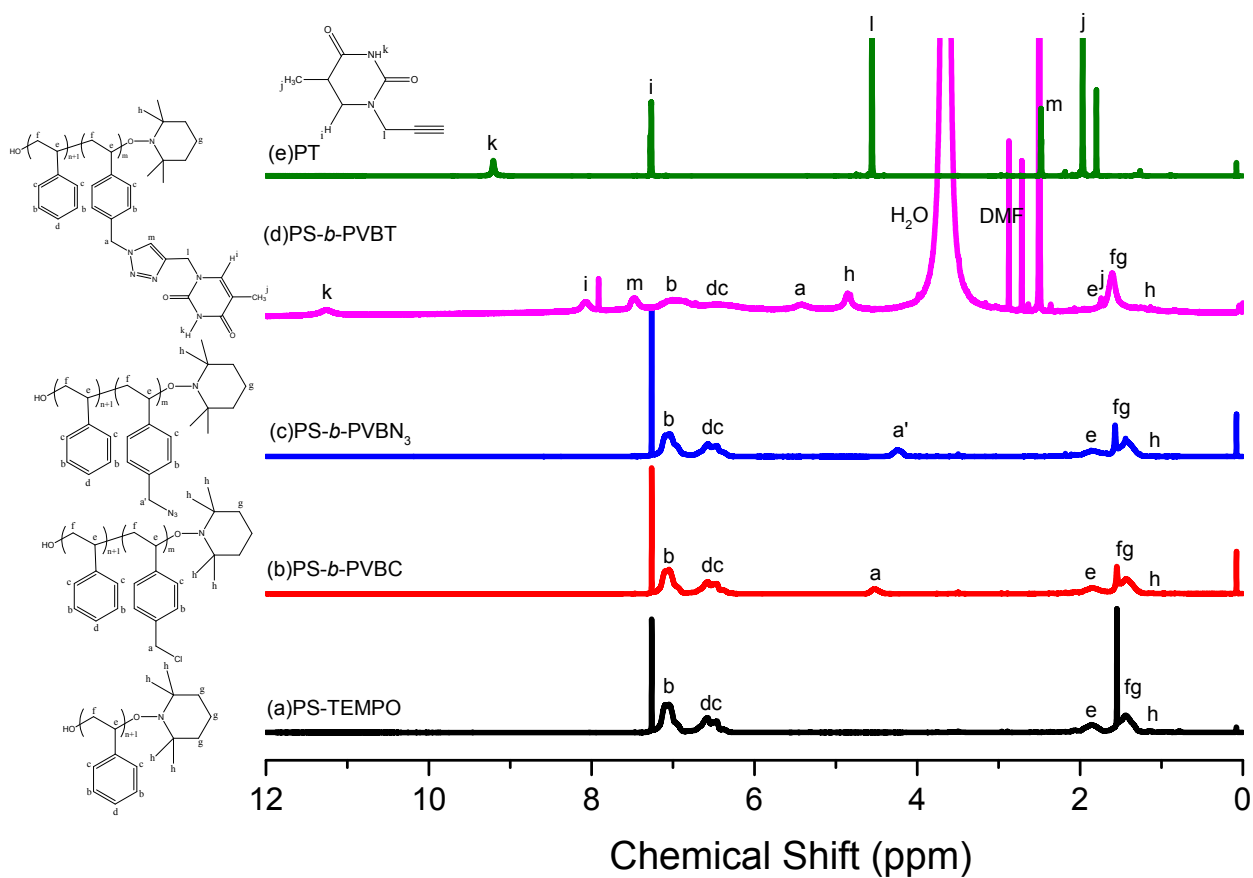

Figure S2:  $^1\text{H}$  NMR spectra of (a) PS-TEMPO, (b) PS-*b*-PVBC, (c) PS-*b*-PVBN<sub>3</sub> in  $\text{CDCl}_3$ , (d) PS-*b*-PVBT in  $d_6$ -DMSO, and (e) PT.

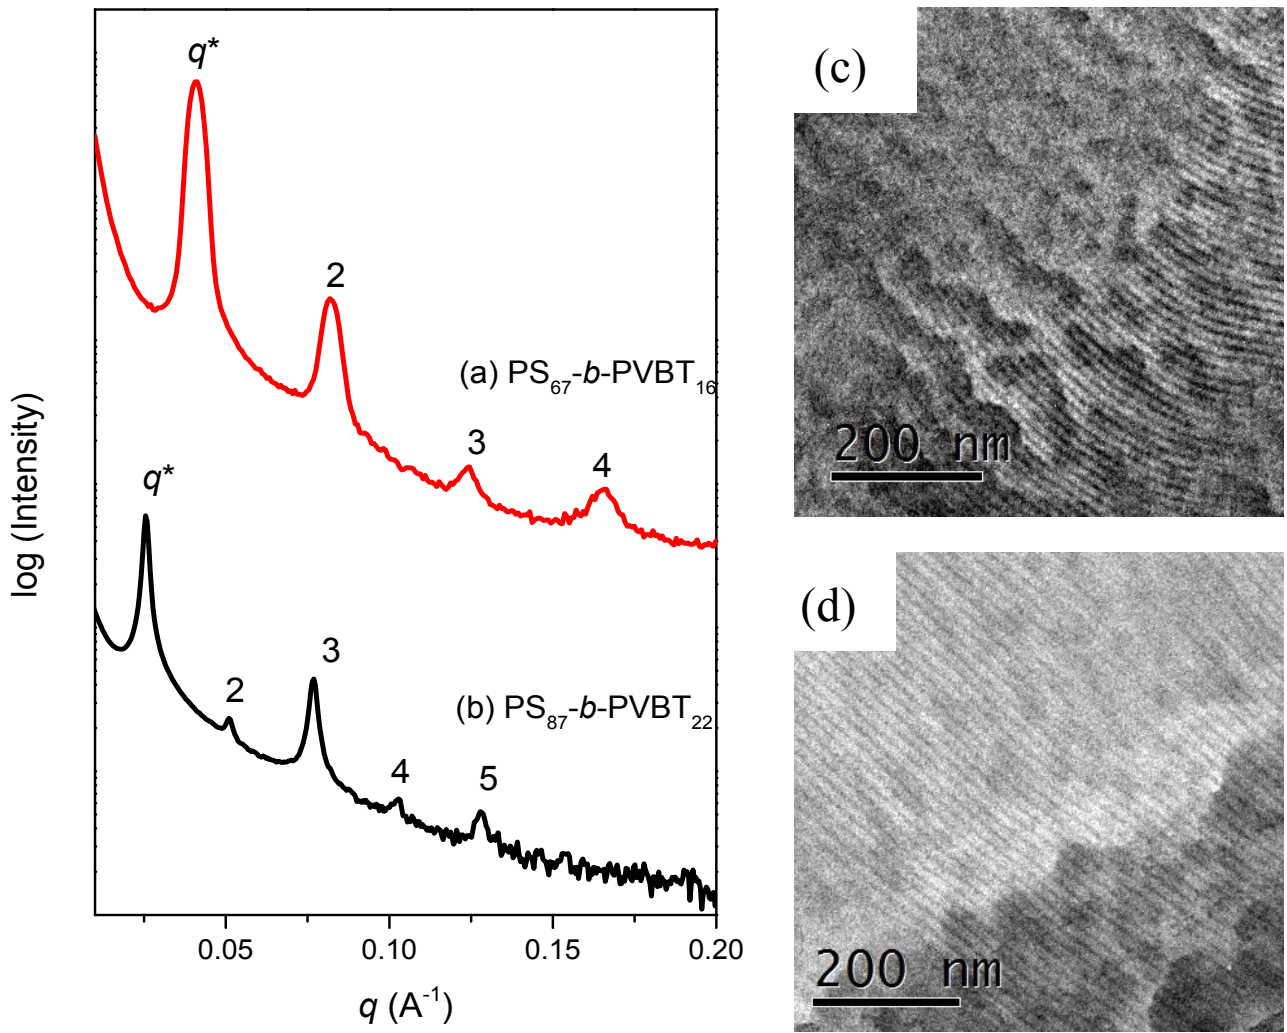

Figure S3: (a, b) SAXS patterns and (c, d) TEM images of (a, c)  $\text{PS}_{67}\text{-}b\text{-PVBT}_{16}$  and (b, d)  $\text{PS}_{87}\text{-}b\text{-PVBT}_{22}$ .

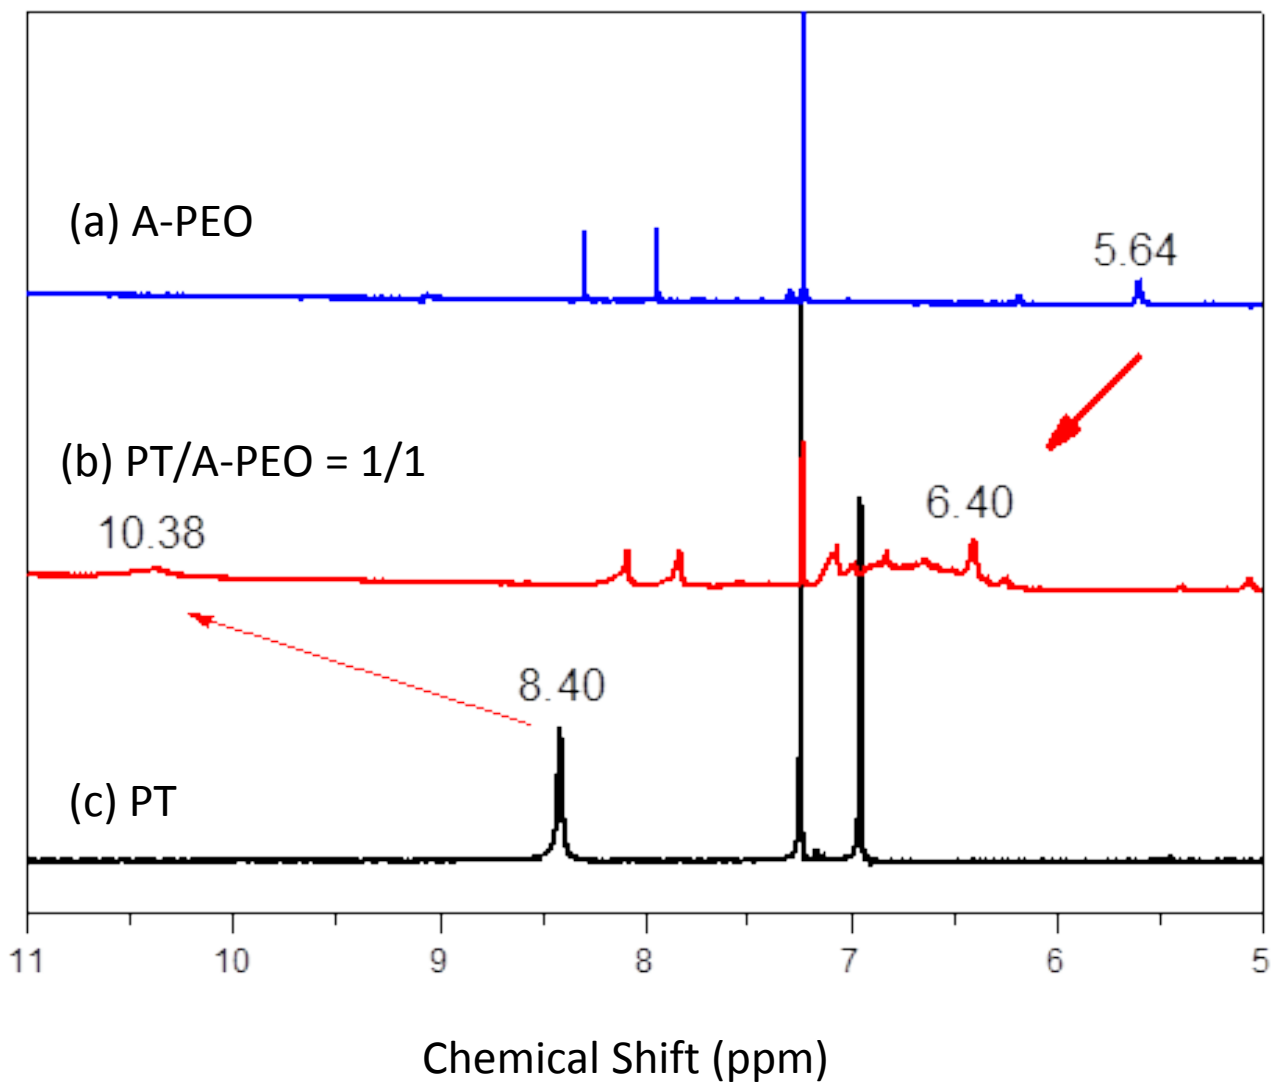

Figure S4:  $^1\text{H}$  NMR spectra of (a) A-PEO, (b) A-PEO/PT (T/A = 1:1), and (c) PT.
